# Supplementary material for: Measuring Safety and Outcomes for the Use of Compassionate and Off-Label Therapies for Children, Adolescents, and Young Adults With Cancer in the SACHA-France Study
Source: PubMed Central journal article supplement (PMC10318477; doi:10.1001/jamanetworkopen.2023.21568), 2023-07-03
Supplement: jamanetwopen-e2321568-s003.pdf [file jamanetwopen-e2321568-s003.pdf]

## Data Sharing Statement

Berlanga. Measuring Safety and Outcomes for the Use of Compassionate and Off-Label Therapies for Children, Adolescents, and Young Adults With Cancer in the SACHA-France Study. *JAMA Netw Open*. Published July 03, 2023. doi:10.1001/jamanetworkopen.2023.21568

### Data

**Data available:** Yes

**Data types:** Deidentified participant data

**How to access data:** [pablo.berlanga@gustaveroussy.fr](mailto:pablo.berlanga@gustaveroussy.fr)

**When available:** With publication

### Supporting Documents

**Document types:** None

### Additional Information

**Who can access the data:** Researchers whose proposed use of the data has been approved

**Types of analyses:** For academic purposes only

**Mechanisms of data availability:** After approval of a proposal
